# Hopanoids confer robustness to physicochemical variability in the niche of the plant symbiont *Bradyrhizobium diazoefficiens*

Elise Tookmanian<sup>1</sup>, Lisa Junghans<sup>4</sup>, Gargi Kulkarni<sup>2</sup>, Raphael Ledermann<sup>5</sup>, James Saenz<sup>4\*</sup>, and  
Dianne K. Newman<sup>2,3\*</sup>

<sup>1</sup>Division of Chemistry and Chemical Engineering, <sup>2</sup>Division of Biology and Biological  
Engineering, <sup>3</sup>Division of Geological and Planetary Science, California Institute of Technology,  
Pasadena CA 91103, <sup>4</sup>B CUBE Center for Molecular Bioengineering, Technische Universität  
Dresden, Germany, <sup>5</sup>Institute of Microbiology, ETH Zurich, Switzerland

\* corresponding authors: [saenz@tu-dresden.de](mailto:saenz@tu-dresden.de), [dkn@caltech.edu](mailto:dkn@caltech.edu)

**Abstract:** Climate change poses a threat to soil health and agriculture, but the potential effects of  
climate change on soil bacteria that can help maintain soil health are understudied. Rhizobia are  
a group of bacteria that increase soil nitrogen content through a symbiosis with legume plants.  
The soil and symbiosis are potentially stressful environments, and the soil will likely become  
even more stressful as the climate changes. Many rhizobia within the bradyrhizobia clade, like  
*Bradyrhizobium diazoefficiens*, possess the genetic capacity to synthesize hopanoids, steroid-like  
lipids similar in structure and function to cholesterol. Hopanoids are known to protect against  
stresses relevant to the niche of *B. diazoefficiens*. Paradoxically, mutants unable to synthesize the  
extended class of hopanoids participate in similarly successful symbioses compared to the wild  
type, despite being delayed in root nodule initiation. Here, we show that in *B. diazoefficiens*, the  
*in vitro* growth defects of extended hopanoid deficient mutants can be at least partially  
compensated for by the physicochemical environment, specifically by optimal osmotic and  
divalent cation concentrations. Through biophysical measurements, we show that extended  
hopanoids confer robustness to environmental variability. These results help explain the  
discrepancy between previous *in vitro* and *in planta* results and indicate that hopanoids may  
provide a greater fitness advantage to rhizobia in the variable soil environment than the more

30 controlled environment within root nodules. To improve the legume-rhizobia symbiosis through  
31 either bioengineering or strain selection, it will be important to consider the full lifecycle of  
32 rhizobia, from the soil to the symbiosis.

33

34 Importance: Rhizobia, such as *B. diazoefficiens*, play an important role in the nitrogen cycle by  
35 making nitrogen gas bioavailable through symbiosis with legume plants. As climate change  
36 threatens soil health, this symbiosis has reentered the spotlight as a more sustainable source of  
37 soil nitrogen than the energy-intensive Haber-Bosch process. Efforts to use rhizobia as  
38 biofertilizers have been effective; however, long term integration of rhizobia into the soil  
39 community has been less successful. This work represents a small step towards improving the  
40 legume-rhizobia symbiosis by identifying a cellular component—hopanoid lipids—that confers  
41 robustness to environmental stresses rhizobia are likely to encounter in soil microenvironments  
42 as sporadic desiccation and flooding events become more common.

43

44 Introduction:

45 The soil is a precious ecosystem. The health of the soil – measured by organic matter and  
46 nutrient content, moisture retention, and the microbial community – predicts how well plants will  
47 grow (1). While practices to maintain healthy soil have been known for centuries, as agriculture  
48 faces the threat of climate change, these sustainable land management practices have garnered  
49 new attention as potential climate change mitigation strategies (2, 3). Crop rotation is an ancient  
50 land management strategy that restores nutrients to the soil. Legumes, such as soybean, peanut,  
51 and alfalfa, are an important component of crop rotations because they increase soil nitrogen  
52 content, reducing reliance on synthesized nitrogen fertilizers (4). However, legumes cannot do

53 this alone: they rely on a symbiosis with a group of polyphyletic soil bacteria called rhizobia (5,  
54 6). This symbiosis is a very close interaction, with the bacteria living intracellularly in  
55 specialized *de novo* organs called root nodules. Low pH, low oxygen, and elevated osmolarity  
56 are maintained within the nodule environment (7–9). While in some ways stressful for the  
57 bacteria, this environment favors bacterial conversion of nitrogen gas to bioavailable ammonia  
58 which eventually is exchanged for reduced carbon in the form of dicarboxylic acids.

59 One way to improve legume use in crop rotations as a sustainable nitrogen fertilizer is to  
60 improve the efficiency of the legume-rhizobia symbiosis. Rhizobia strains with greater symbiotic  
61 efficiency, as measured by nitrogen fixation rates and legume growth, have been isolated and  
62 applied to the soil or to legume seeds. This strategy has been used successfully at scale with  
63 legume crops such as soybean in Brazil (10–12). However, the rhizobia often fail to stably  
64 integrate into the soil community, so these inoculations must be repeated each year (13–16).  
65 Beyond the symbiosis itself, the rhizobia can have positive effects on the plant when living in the  
66 soil, such as relieving salinity stress and increasing water and nutrient uptake (17–19). These  
67 positive effects will become even more important as the climate changes, leading to drastic  
68 changes in precipitation and thus soil water potential and osmotic strength. To successfully use  
69 legumes in crop rotations to increase soil nitrogen content as the climate changes, rhizobia must  
70 be successful in both the symbiosis and surviving the soil environment. The fact that these  
71 bacteria are ubiquitous indicates that they have strategies to accomplish both goals (20).

72 As recently discussed, possession of an adaptable outer membrane may provide an  
73 important fitness advantage in this context (9). Rhizobia produce modified lipid A, a major  
74 component of the lipopolysaccharides (LPS) that make up the outer leaflet of the outer  
75 membrane (21, 22). These modifications trend toward increasing the hydrophobicity and other

76 cohesive interactions that lead to a more robust outer membrane (23, 24). Additionally, a subset  
77 of rhizobia, mostly within the *Bradyrhizobia* clade, make hopanoids, a class of sterol-like lipids,  
78 which maintain resistance to environmental stressors such as pH, temperature, antibiotics and  
79 foster successful symbioses (25, 26). Some *Bradyrhizobia* also attach hopanoids to lipid A,  
80 which appears to act as a hydrophobic hook into the inner leaflet of the outer membrane (27–29).  
81 This hopanoid attached to lipid A (HoLA) is synthesized from extended hopanoids, a subclass of  
82 hopanoids with an added hydrophilic tail (Figure 1) (25).

83 Intriguingly, generating a mutant that is unable to make any type of hopanoid by  
84 removing the first committed step in hopanoid biosynthesis ( $\Delta shc$ ) has evaded realization in  
85 *Bradyrhizobium diazoefficiens*, pointing to an essential role for hopanoids in this strain (25).  
86 Removing the ability to synthesize C<sub>35</sub> or “extended” hopanoids ( $\Delta hpnH$ ), however, was  
87 achieved, and has a large effect on the fitness of *B. diazoefficiens in vitro* (25, 30). The  $\Delta hpnH$   
88 mutant manifests growth defects at high osmolarity and is unable to grow under low pH or  
89 microaerobic conditions – all conditions thought to characterize the root nodule. While the  
90  $\Delta hpnH$  mutant exhibits defects *in planta*, especially in root nodule initiation, the nitrogen  
91 fixation rate in symbiosis with the tropical legume *Aeschynomene afraspera* when normalized  
92 for nodule dry weight is not significantly different between the  $\Delta hpnH$  mutant and WT and the  
93 majority of  $\Delta hpnH$ -infected nodules grow at rates comparable to the WT (30). Given the growth  
94 defects of the  $\Delta hpnH$  mutant observed *in vitro* in the presence of environmental stresses expected  
95 within the root nodule, these results were surprising. Here, we investigate this paradox by  
96 exploring the nuanced interplay between the lack of extended hopanoids and an environmentally  
97 relevant concentration range of osmolytes and cations.

98

99 Materials and Methods

100 **Bacterial strains, Culture Media, and Chemicals.** All strains used in this study are described in  
101 Table S1 in the supplemental material. All strains were grown aerobically with shaking at 250  
102 rpm. *Escherichia coli* strains were grown in lysogeny broth (LB) at 37°C (31). *B. diazoefficiens*  
103 strains were grown at 30°C in either peptone-salts-yeast extract medium with 0.1% arabinose  
104 (PSY) (32, 33) or arabinose-gluconate medium (AG) (34, 35). The pH of the AG medium was  
105 adjusted to pH 6.6 using a NaOH solution or to pH 5 using a HCl solution. For pH 5 AG media,  
106 the HEPES buffer component was replaced with 5.5 mM MES buffer for a total of 11 mM MES.  
107 A low divalent cations pH 5 AG media was made containing 45 µM CaCl<sub>2</sub> and 400 µM MgSO<sub>4</sub>.  
108 Inositol, sorbitol, CaCl<sub>2</sub>, or MgCl<sub>2</sub> were added to the appropriate base medium. For induction of  
109 the cumate inducible promoter, cumate was added to liquid or solid medium for a final  
110 concentration of 25 µM from a 400x stock solution in ethanol (36–39). Agar plates were made  
111 containing 1.5% (w/v) agar. Antibiotics were used for selection at these concentrations (µg/ml):  
112 spectinomycin (Sp), 100; kanamycin (Km), 100; tetracycline (Tc), 20 for liquid cultures of *B.*  
113 *diazoefficiens* and 50 for plates for *B. diazoefficiens* and for *E. coli*. Chemicals were purchased  
114 from Sigma-Aldrich unless otherwise noted: glycerol (VWR), Hepes (Gold BioTechnology),  
115 sodium chloride yeast extract, magnesium sulfate, magnesium chloride, sorbitol, sodium  
116 hydroxide (Fisher Scientific), arabinose (Chem-Impex International, Inc), sodium sulfate  
117 (Mallinckrodt Chemical), peptone, and agar (Becton Dickinson).

118

119 **DNA methods, plasmid construction, and transformation.** All plasmid constructions and  
120 primers used in this study are described in Table S1 in the supplemental material. Standard  
121 methods were used for plasmid DNA isolation and manipulation in *E. coli* (40). The strong

122 constitutive promoter  $P_{rrn-mut2}$  (41) was annealed from oligonucleotides  $P_{rrn-mut2\_f}$  and  $P_{rrn-}$   
123  $mut2\_r$  and cloned into *HpaI/BsrGI*-digested pQH2, resulting in plasmid pQH2- $P_{rrn-mut2}$ . The  
124 resulting inducible system (containing  $P_{bla-mut1T-cymR^*}$  and  $P_{rrn-mut2}$  flanked by *cuO*) was  
125 subsequently excised with *SpeI* and *PciI* and ligated into pRJpaph-lacZYA prepared with *SpeI*  
126 and *NcoI*, resulting in plasmid pRJpCu1-lacZYA. The PCR product of the *shc* gene was cloned  
127 into the pRJpCu plasmids respectively to obtain expression plasmids. The pRJpCu-*shc* plasmid  
128 was mobilized into WT, followed by the pGK302, the markerless deletion vector to delete *shc*  
129 (*blr3004*) (42). Plasmids were mobilized by conjugation from *E. coli* S17-1 into *B. diazoefficiens*  
130 strains as previously described with the following modifications (43). The pRJpCu-*shc* plasmid  
131 was stably integrated as a single copy into the *scoI* downstream region of *B. diazoefficiens* as  
132 described previously (44).

133

134 **Induction conditions and reporter activity measurements** Cultures were grown in PSY to a  
135 mid-exponential phase and induced with 25  $\mu$ M (final concentration) cumate or pure ethanol (the  
136 solvent for cumate) for controls. For quantitative LacZ assays, cells were centrifuged (5000 x g)  
137 and washed twice.  $\beta$ -Galactosidase assay was done as previously described (31). One biological  
138 replicate was defined as an independent culture, each replicate was assayed in technical  
139 duplicates of which the arithmetic mean was used for final data plotting.

140

141 **Streaking strains.** Liquid cultures were grown from plates to early stationary phase (OD 0.9-1.2  
142 by Beckman Coulter UV-VIS) in AG media. The cultures were spun down and resuspended to  
143 OD<sub>600</sub> 0.5 in fresh media. 10  $\mu$ L of culture was spotted on each plate and spread using a sterilized  
144 spreader.

145

146 **Osmometer measurements.** The osmolarity of PSY and AG media were measured using a  
147 Wescor Vapro 5520 vapor pressure osmometer. Before use, the osmometer was calibrated using  
148 100 mM, 300 mM, and 1000 mM OptiMole standards from ELITechGroup.

149

150 ***B. diazoefficiens* pregrowth.** 5 mL of fresh media was inoculated with multiple colonies per  
151 strain were picked using a sterile stick. After 2-3 days, when the cultures were visibly turbid,  
152 these cultures were subcultured into 5 mL of fresh media and allowed to grow to mid-late  
153 exponential phase (OD<sub>600</sub> 0.5-1). The subculturing was repeated, and the second subculture was  
154 used as the inoculum for all experiments unless otherwise noted.

155

156 **Growth curves.** The growth curve assays were performed in 96 well tissue culture plates  
157 (Genesee Scientific) using a Spark 10M multimode microplate reader (Tecan, Grödig, Austria).  
158 Wells were topped with 50 µL autoclaved mineral oil. Optical density absorbance was taken at  
159 600 nm at 30-minute increments at 30°C with continuous linear shaking.

160

161 **Growth curve parameter estimation.** To estimate the maximum specific growth rate ( $\mu_m$ ) and  
162 lag time ( $\lambda$ ) for the growth curves, the data was fit using an R application that relies on nonlinear  
163 least squares to fit nonlinear models to the following Gompertz curve equation (45, 46):

$$OD_{600} = A * \exp \left( -\exp \left( \frac{\mu_m}{A} (\lambda - t) + 1 \right) \right) + C$$

164 where A is the final OD<sub>600</sub>, t is the time in hours, and C is an adjustment for initial OD<sub>600</sub>. The R  
165 application can be found at the following github repository: <https://github.com/scott->

166 saunders/growth\_curve\_fitting The specific version of the growth fitting R application used was  
167 retrieved on July 13, 2021 and can be found here: [https://github.com/scott-](https://github.com/scott-saunders/growth_curve_fitting/blob/master/growth_curve_fitting_ver0.2.Rmd)  
168 saunders/growth\_curve\_fitting/blob/master/growth\_curve\_fitting\_ver0.2.Rmd This is a direct  
169 link to the application that can be run locally: [https://scott-h-](https://scott-h-saunders.shinyapps.io/gompertz_fitting_0v2/#section-parameter-estimates)  
170 saunders.shinyapps.io/gompertz\_fitting\_0v2/#section-parameter-estimates

171

172 **Viable-cell plate counts.** Viable-cell plate counts were performed by serially diluting samples in  
173 fresh AG media. Dilutions spanning 6 orders of magnitude were plated on AG agar plates as 10  
174  $\mu$ l drips. Plates were incubated at 30°C. Colonies were counted after 4 days for WT and  $\Delta$ *hpnH*  
175 complement and after 5 days for  $\Delta$ *hpnH*.

176

177 **Lipid packing.** Three biological replicates were grown at 30°C and harvested at mid-  
178 exponential ( $OD_{600} = 0.5$ ). Cells were kept at 30°C throughout the entire procedure. Harvested  
179 cells were washed 2x by pelleting at 5000 rcf for 7 minutes and resuspending in fresh medium at  
180 an  $OD_{600}$  of 0.2. Cells were then transferred to black bottom 96-well plates and stained with 80  
181 nM Di-4 ANEPPDHQ (ThermoFisher, D36802). All spectroscopic measurements were carried  
182 out using a SPARK 20 plate reader (Tecan, Grödig, Austria) equipped with a thermostat capable  
183 of maintaining the temperature with the accuracy of  $\pm 1^\circ\text{C}$ . Samples were incubated for  
184 30 minutes at 150 rpm. Fluorescence emission was measured in the ‘top reading mode’ of the  
185 setup in the epi-configuration using a 50/50 mirror and two monochromators (for selecting  
186 excitation and emission wavelengths). The sample was excited with xenon flash lamp with the



187 excitation monochromator set to 485 nm (20 nm bandwidth). The fluorescence emission was  
188 measured at 540 nm and 670 nm wavelength (20 nm bandwidth each).

189 General polarization (GP) was calculated from Di4 emission using following formula:

$$GP = \frac{I_{540} - I_{670}}{I_{540} + I_{670}}$$

190 where  $I$  is the fluorescence emission intensity at given wavelength after a subtraction of the  
191 signal measured for the blank suspension.

192

### 193 **Fluorescein diacetate (FDA) permeability assay.**

194 To assess relative changes in permeability we employed an assay based on the hydrolysis of  
195 FDA to fluorescein after it diffuses into the cell (47, 48). Three biological replicates of each  
196 strain were grown until till early exponential ( $OD_{600} = 0.5$ ). Harvested cells were washed 2x by  
197 pelleting at 5000 rcf for 7 minutes and resuspending in fresh medium at an  $OD_{600}$  of 0.2. Cells  
198 were then transferred to black bottom 96-well plates and FDA (Sigma F7378) was added directly  
199 to each well to a final concentration of 20 $\mu$ M. All spectroscopic measurements were carried out  
200 using a SPARK 20 plate reader (Tecan, Grödig, Austria) equipped with a thermostat capable of  
201 maintaining the temperature with the accuracy of  $\pm 1^{\circ}\text{C}$ . Immediately following the addition of  
202 FDA, samples were measured every 3 minutes for 39 minutes. Excitation was set to: 485 nm  
203 (20 nm bandwidth), and emission intensity was measured at 525nm (20 nm bandwidth). The  
204 relative permeability of FDA hydrolysis was estimated as the slope of fluorescence vs. time for  
205 39 minutes.

206

### 207 Results

208 **Hopanoids are conditionally essential in *B. diazoefficiens*.** Due to the previous difficulties  
209 isolating a *shc* deletion strain in *B. diazoefficiens*, we decided to construct a conditional SHC  
210 expression strain in a  $\Delta shc$  background. The conditional expression system employed a cumate  
211 repressor system that was modified for *B. diazoefficiens*, where cumate relieves repression of  
212 transcription of the gene of interest (Table S1). With the cumate conditional SHC expression  
213 strain in hand, we tested the growth of the strain on plates made up of different media commonly  
214 used to cultivate rhizobia *in vitro* (Figure 2). The cumate conditional SHC expression strain was  
215 unable to grow on PSY media without cumate present. Therefore, in PSY media, hopanoid  
216 production appears to be essential for the growth of *B. diazoefficiens*. However, when we tested  
217 for growth on AG medium plates, we observed moderate growth compared to WT without  
218 cumate added. This unexpected result indicated that hopanoids are not essential under this  
219 condition. With this in mind, we considered the compositional differences between these two  
220 media (Table 1). While there are many altered components between the two media, two aspects  
221 that stood out to us were the differences in osmolarity and the differences in divalent cation  
222 concentrations. Osmolarity is thought to be elevated in the root nodule and can span a wide range  
223 in the soil environment (9). Divalent cations are known to stabilize the outer membrane through  
224 interactions with LPS, especially calcium (23, 49). The medium osmolarity was 16 mM greater  
225 and the divalent cation concentration was almost doubled in PSY compared to the AG medium  
226 (Table 1), suggesting that hopanoids are necessary to withstand certain levels of osmolytes  
227 and/or ionic strength in *B. diazoefficiens*.

228 Despite this realization, we continued to struggle with obtaining a clean *shc* deletion  
229 mutant in AG medium, likely due to the fact that the sucrose-selection method we were using to  
230 generate the mutant strain (50) exposed it to an osmotic stress beyond the threshold it could

231 tolerate. Accordingly, to probe how the medium composition affects *B. diazoefficiens* strains  
232 lacking hopanoids and what this reveals about the ecophysiological role of hopanoids more  
233 generally, we turned to the *B. diazoefficiens*  $\Delta hpnH$  strain. To verify that the experimental results  
234 using the *B. diazoefficiens*  $\Delta hpnH$  strain are due to the lack of extended hopanoids, we  
235 constructed a complement strain with the *hpnH* gene under control of the  $P_{aphII}$  constitutive  
236 promoter integrated at the *scoI* locus, as used previously to express a range of fluorescent  
237 proteins (44). These strains were tested under the same conditions, and we observed that  $\Delta hpnH$   
238 also showed better growth on AG medium plates compared to PSY plates, while the  $\Delta hpnH$   
239 complement strain behaved similarly to WT. Previously,  $\Delta hpnH$  was shown to be unable to grow  
240 at pH 6 in PSY medium (25). The pH within the root nodules and in the legume rhizosphere is  
241 known to be acidic (7, 51), so we tested the growth of our strains on pH 5 AG media plates  
242 (Figure 2). Interestingly, while growth was lower for the  $\Delta hpnH$  strain and the *shc* conditional  
243 mutant at this pH, they were still able to grow. This result indicates that hopanoids are not  
244 essential at low pH under all conditions.

245  
246 **Extended hopanoids protect *B. diazoefficiens* in stationary phase and at low pH.** To better  
247 understand how the  $\Delta hpnH$  strain grows in AG medium, we quantified different aspects of the  
248 growth curve. In PSY, the  $\Delta hpnH$  strain has a pronounced defect in both exponential and  
249 stationary phase (25). Even when  $\Delta hpnH$  and WT cultures were sampled at the same OD<sub>600</sub> in  
250 exponential phase,  $\Delta hpnH$  had drastically lower viability than WT; we reasoned this might be  
251 due to initial inoculum viability differences from “overnight” cultures. To test and pre-empt this,  
252 we subcultured twice from an initial turbid culture inoculated with colonies from a fresh plate.  
253 Using this technique, we observed that the  $\Delta hpnH$  mutant strain has only a very slight growth

254 defect compared to WT and the  $\Delta hpnH$  complement in the pH 6.6 AG medium (Figure 3). To  
255 confirm that the similarity in OD<sub>600</sub> is due to a comparable number of viable cells, we  
256 determined colony forming units (CFUs) after 24 hours (mid-late exponential) and 72 hours  
257 (stationary phase) of growth. After 24 hours, the CFUs were very similar but after 72 hours, the  
258  $\Delta hpnH$  strain was much worse off, leading to a significant difference in CFUs between the WT  
259 and  $\Delta hpnH$  strain. This result confirms the stationary phase defect observed previously in PSY  
260 medium, and that our culturing method successfully removes differences in inocula that  
261 influenced previous experiments. Using this approach, we tested the  $\Delta hpnH$  strain's growth in  
262 the pH 5 AG medium (Figure 3 and Figure S1). Here, we observed a significant defect in growth  
263 rate and increased stationary phase death for the  $\Delta hpnH$  strain compared to WT and the  $\Delta hpnH$   
264 complement. Upon inspection, clumping of the  $\Delta hpnH$  strain was observed in the wells of the  
265 plate, perhaps indicating death followed by increased biofilm formation.

266

267 **Physicochemical medium conditions affect the growth of *B. diazoefficiens*  $\Delta hpnH$ .** Having  
268 discovered that growth defects are condition-dependent for the hopanoid deficient  $\Delta shc$  strain,  
269 we decided to check whether this was also true for the growth defect of the  $\Delta hpnH$  strain in pH 5  
270 AG medium. First, we tested the effects of osmolarity by adding the nonmetabolizable, nonionic  
271 osmolyte inositol (Figure 4). The growth rate and lag time parameters were estimated using a  
272 Gompertz model. As the concentration of inositol was increased from 25 mM to 400 mM, the  
273 growth rate decreased for WT and the  $\Delta hpnH$  complement (Figure S2). However, the growth rate  
274 for the  $\Delta hpnH$  strain increased to a maximum growth rate with 100 mM inositol added, before  
275 decreasing. The  $\Delta hpnH$  strain never reached the same growth rate as WT, but the differences in  
276 the growth rate response over this osmolarity range illustrates that the strains experience these

277 conditions very differently and that a “Goldilocks” osmotic zone exists for the *ΔhpnH* mutant  
278 where its growth is enhanced. A similar trend was observed with lag time, where the *ΔhpnH*  
279 strain exhibited a minimum lag time at 100 mM inositol added. The lag time of the WT and the  
280 *ΔhpnH* complement remained relatively constant up to 100 mM inositol added and then steadily  
281 increased. These experiments were also completed with sorbitol as the osmolyte for WT and the  
282 *ΔhpnH* strain, showing similar results (Figure S3).

283         Next, we tested the effects of divalent cations on growth. Because the AG medium  
284 already has almost double the divalent cation concentration as the PSY medium, we created a  
285 “low dication” pH 5 AG medium using the PSY concentrations of divalent cations, specifically  
286 magnesium and calcium (45 mM Ca<sup>2+</sup> and 400 mM Mg<sup>2+</sup>). We then increased the calcium ion  
287 concentration in this low dication AG medium. The growth rate and lag time for WT and the  
288 *ΔhpnH* complement were agnostic to these changing conditions (Figure 5). However, the *ΔhpnH*  
289 strain grew at a slower rate and with a longer lag time in the low dication AG medium condition,  
290 indicating that 45 μM may be particularly stressful for the *ΔhpnH* strain. The growth rate  
291 recovered with 100 μM additional calcium and remained at the same growth rate. The lag time  
292 decreased as well as the calcium concentration was increased. When 500 μM additional calcium  
293 was added to the low divalent cation condition, the growth curve for *ΔhpnH* became almost  
294 indistinguishable from the pH 5 AG medium. These experiments were also completed with  
295 magnesium as the divalent cation for WT and the *ΔhpnH* strain with similar but less pronounced  
296 results (Figure S4).

297         Together, these results indicate that the lack of extended hopanoids can be compensated  
298 for by changing the physicochemical properties of the growth medium, specifically the  
299 osmolarity and divalent cation concentration. Unlike the pattern seen for osmolytes for *ΔhpnH*,

300 where an intermediate concentration minimized lag time and increased growth rate, increasing  
301 concentrations of divalent cations increasingly shrunk the lag time yet did not appreciably affect  
302 growth rate.

303

304 **Extended hopanoids are required to regulate the membrane properties of *B. diazoefficiens*.**

305 In order to explain the growth phenotypes of the  $\Delta hpnH$  strain, we hypothesized that extended  
306 hopanoids play a role in buffering the outer membrane against physicochemical perturbations.  
307 Indeed, the unextended hopanoid, diploptero, is known to modulate changes in lipid A packing  
308 *in vitro* that occur in response to decreased pH (52). To probe the underlying mechanism behind  
309 the physicochemical compensation for loss of extended hopanoids, we used the lipophilic dye  
310 Di-4-ANEPPDHQ (Di-4) (Figure 6A). The general polarization (GP) of Di-4 reports on lipid  
311 packing, with higher GPs indicative of increased packing. Because lipid packing is correlated  
312 with viscosity and bilayer stability it provides a robust general indicator of changes in membrane  
313 biophysical properties (53, 54). Because of its size (665.55 MW) and polarity, Di-4 should  
314 preferentially label the outer leaflet of the outer membrane, and has been routinely used to  
315 monitor changes in surface membrane lipid packing (55). However, given the interplay between  
316 membrane stability and permeability, the assumption that Di-4 selectively labels the outer leaflet  
317 of the outer membrane may not hold if membrane permeability is increased sufficiently to allow  
318 Di-4 to cross the outer membrane. Outer membranes contain saturated Lipid A and have been  
319 shown to have similar lipid packing to liquid ordered phase membranes *in vitro* (56) whereas  
320 inner membranes comprise more disordered phospholipids, which should have lower lipid  
321 packing similar to a liquid disordered phase. Thus, a large decrease in Di4 GP could either be  
322 interpreted as a decrease in outer membrane lipid packing, or to a large increase in outer

323 membrane permeability allowing Di4 to label the inner membrane. Both results would indicate a  
324 large change in the mechanical properties of the outer membrane.

325 To evaluate the role of extended hopanoids in outer membrane acclimation to pH and  
326 osmotic strength, we compared Di-4 GP in cells grown at pH 6.6 and 5, and cells grown at pH 5  
327 in the presence and absence of inositol. The Di-4 GP values for WT and the  $\Delta hpnH$  complement  
328 strains were almost identical across the three conditions (pH 6.6 AG media, pH 5 AG media, and  
329 pH 5 AG media + 100 mM inositol), which indicates that the outer membrane of our  
330 complement strain is responding very similarly to WT. The  $\Delta hpnH$  strain had lower GP values  
331 than the WT and the  $\Delta hpnH$  complement when grown in pH 6.6 AG media. Additionally, all  
332 three strains have higher GP values when grown in pH 5 AG medium, which is consistent with  
333 observations that low pH increases the packing and order of LPS (52, 57). Interestingly, WT and  
334 the  $\Delta hpnH$  complement showed a small decrease in GP values in AG pH 5 medium with 100  
335 mM inositol added, while the  $\Delta hpnH$  strain GP values continued to increase.

336 To better interpret these results, we determined the  $\Delta GP$  values, comparing the change in  
337 GP compared to the standard pH 6.6 AG medium condition. WT and the  $\Delta hpnH$  complement  
338 underwent very small changes compared to the  $\Delta hpnH$  strain. In addition to exhibiting  
339 comparably more GP variability with changing osmolarity,  $\Delta hpnH$  showed a very large negative  
340 shift of around 0.3 GP at pH 6.6. Such a large negative shift in GP suggested a considerable  
341 change in mechanical properties of the outer membrane at higher pH. To determine whether this  
342 might be the result of compromised outer membrane integrity, we examined whether cell  
343 envelope permeability of  $\Delta hpnH$  at pH 6.6 was higher than for other conditions and strains. We  
344 estimated changes in membrane permeability using an assay based on relative changes in  
345 fluorescein diacetate (FDA) diffusivity (47). FDA is non-fluorescent, and rapidly diffuses into

346 the cell where it is hydrolysed. Fluorescein, which is fluorescent, is produced from the hydrolysis  
347 of FDA. Additionally, because fluorescein is charged, it cannot diffuse rapidly out of the cell.  
348 Therefore, the rate of increase in fluorescein fluorescence can provide an estimate of the relative  
349 permeability of FDA across the cell envelope of different strains or across varying growth  
350 conditions. We observed that  $\Delta hpnH$  had nearly 3-fold higher permeability than WT at pH 6.6,  
351 and nearly 10-fold higher permeability compared with  $\Delta hpnH$  at pH 5 with and without inositol  
352 (Figure 6B). The large negative shift in Di-4 GP values at pH 6.6, therefore is consistent with  
353 both reduced lipid packing and compromised membrane integrity. Overall, these results show  
354 that extended hopanoids play an important role in buffering *B. diazoefficiens* membrane  
355 properties against physicochemical perturbations.

356

## 357 Discussion

358 By making a serendipitous observation of the conditional essentiality of the *shc* gene in  
359 *B. diazoefficiens*, we discovered that the physicochemical environment is extremely important  
360 for the growth of hopanoid deficient *B. diazoefficiens* strains, including the extended hopanoid  
361 deficient mutant,  $\Delta hpnH$ . We confirmed that the  $\Delta hpnH$  strain undergoes significant death in  
362 stationary phase, but that, in contrast to previous results (25), it can grow at pH 5 in a medium  
363 with higher osmolarity and divalent ion concentration. We identified environmentally relevant  
364 conditions that partially compensate for the *B. diazoefficiens*  $\Delta hpnH$  mutant growth defect at low  
365 pH: intermediate osmolarity and elevated divalent cation concentrations. Finally, using a  
366 biophysical technique, we discovered that extended hopanoids are important for modulating lipid  
367 packing of the outer membrane.



368           When we first discovered that our conditional  $\Delta shc$  mutant could grow on solid AG  
369 medium without cumate induced hopanoid production but not on PSY medium, it caused us to  
370 reexamine our previous results with  $\Delta hpnH$  carried out in PSY (25). As previously shown,  
371  $\Delta hpnH$  has a stationary phase defect and increased lag time when grown in PSY. When  
372 additional stress was added to the PSY condition, such as increased temperature, lowered pH, or  
373 microoxia, the  $\Delta hpnH$  strain was unable to grow at all. It is possible that due to its stationary  
374 phase defect under these conditions, the  $\Delta hpnH$  inoculum in these experiments may have had  
375 fewer viable cells than WT, despite similar optical density measurements, contributing to the  
376 severity of these phenotypes. Indeed, the “control” growth of the  $\Delta hpnH$  mutant is visually  
377 reduced compared to the WT in the stressor gradient plate assay performed in these studies,  
378 consistent with this hypothesis. With this in mind, our revised inoculation protocol enabled us to  
379 see that  $\Delta hpnH$  grows very similarly to WT in AG medium and can even grow at pH 5.  
380 Surprisingly,  $\Delta hpnH$  experiences significant death in stationary phase compared to WT in AG  
381 medium, despite the optical density measurements remaining constant. These results highlight  
382 the importance of not relying on optical density measurements to assess bacterial viability, as  
383 they can be de-coupled; a known but often forgotten phenomenon. It is likely that the previous  
384 results in PSY were accentuated due to differences in inoculum viability, representing the  
385 combined effects of the stationary and exponential phase growth defects.

386           As we tried to understand why the two media affect the growth of our hopanoid deficient  
387 mutants differently, we reflected on their composition. Three differences stood out to us:  
388 differences in pH, divalent cations, and osmolarity. Previous research on  $\Delta shc$  mutants in other  
389 closely related bacteria have shown that hopanoids are important in both acidic and basic  
390 conditions. Specifically, a  $\Delta shc$  mutant of *Rhodopseudomonas palustris* failed to grow as it made

391 the medium more basic (58). We know that in both PSY and AG media, *B. diazoefficiens*  
392 increases the pH through amino acid metabolism of the complex media (i.e., yeast extract).  
393 However, the AG medium also contains a higher buffering capacity at a lower pH than PSY (6.6  
394 vs 7), thus likely extending the time before the pH is increased substantially. Therefore, the  
395 conditional  $\Delta shc$  mutant's lack of growth on PSY medium and growth on AG medium is perhaps  
396 not entirely surprising and illustrates how important medium composition may be when isolating  
397 and growing a mutant in hopanoid production or other membrane component.

398         The higher concentration of divalent cations, specifically, magnesium and calcium, in the  
399 AG medium compared to PSY, was interesting because of the role these cations play in outer  
400 membrane cohesion. Specifically, magnesium and calcium intercalate within the LPS layer,  
401 shielding negatively charged residues, resulting in a more ordered and robust outer membrane in  
402 the face of physicochemical stressors (23, 49). Our two hopanoid deficient mutants cannot make  
403 HoLA, a component of LPS that contributes to membrane ordering (27, 59). Recent work in  
404 *Bradyrhizobium* BTai1 has revealed that calcium ions increase membrane bilayer thickness, an  
405 indication of increased membrane order, in membrane vesicles containing LPS without a  
406 hopanoid attached (59); this phenomenon suggests a mechanism whereby calcium may be able to  
407 compensate for lack of hopanoids. Our work shows that the lag time of  $\Delta hpnH$  in pH 5 AG  
408 medium can be reduced by increasing concentrations of divalent cations, supporting this  
409 hypothesis. Calcium has a greater effect than magnesium, likely reflecting the fact that calcium  
410 ions more strongly increase lipid bilayer rigidity through dehydration effects than magnesium  
411 ions (60). WT was agnostic to these changes in divalent ion concentration perhaps due to the  
412 presence of HoLA, unlike other *Bradyrhizobia* strains (61). Interestingly, while calcium is  
413 maintained at low concentrations (0.1  $\mu\text{M}$ ) in the cytosol of plant cells, calcium has been shown

414 to localize to the root nodule (62). Calcium binding proteins were specifically found in the root  
415 nodules from *Medicago truncatula* (63). Indeed, sufficient calcium is needed for the bacteria to  
416 fix nitrogen in the root nodules (62, 64). This evidence illustrates the importance of calcium  
417 within the acidic root nodule (7), and helps rationalize why the  $\Delta hpnH$  mutant grows reasonably  
418 well in planta: elevated calcium levels may compensate for the loss of extended hopanoids  
419 within the root nodule.

420 We were surprised when we found that the AG medium has a higher osmolarity than the  
421 PSY medium, since our previous *in vitro* studies in PSY medium indicated that hopanoids can be  
422 protective against hyperosmotic stress (25). Yet, as previously noted, these media are  
423 compositionally different in more than one way. It thus appeared possible that, at a lower pH, the  
424 relationship between osmolarity and hopanoids might be more nuanced. We hypothesized that  
425 hypoosmolarity might also be stressful for hopanoid-deficient mutants that have less robust  
426 membranes, and our findings bore this out. A potential mechanism that explains this observation  
427 follows: When first introduced to hypoosmotic conditions, water tries to move into the higher  
428 osmolarity cell, likely causing at least a transient increase in membrane fluidity as the cell  
429 stretches to accommodate the increased volume (65). The cell responds by opening  
430 mechanosensitive channels to eject solutes and lower the cytosolic osmolarity while synthesizing  
431 osmoregulated periplasmic glucans, thus osmotically buffering the cytoplasm (66). In a cell with  
432 a less robust membrane and perhaps increased permeability due to the absence of hopanoids, the  
433 increased fluidity during initial water influx may kill some cells, while the periplasmic glucans  
434 may be more easily lost to the medium, losing their ability to osmotically buffer the cytoplasm.  
435 At low pH, these effects would be magnified as the influx of water would also bring an influx of  
436 protons, adding an additional stress. When we added inositol to the pH 5 AG medium, the

437 *ΔhpnH* strain grew better, decreasing the lag time and increasing growth rate up to 100 mM  
438 added inositol. Comparatively, WT grew more poorly upon even the smallest addition of inositol  
439 (25 mM). This result illustrates that the low osmolarity of the medium is particularly stressful to  
440 the *ΔhpnH* strain. Interestingly, inositol makes up a large proportion of the compounds found in  
441 the symbiosome space (67). Indeed, the symbiosome space contains approximately 180 mM of  
442 low molecular weight compounds (67), notably similar to the maximally restorative osmolarity  
443 in our experiments (100 mM inositol pH 5 AG medium). It is thus possible that the root nodule  
444 microenvironment allows the *ΔhpnH* strain to survive and fix nitrogen, despite its obvious  
445 growth defects at low pH.

446         Interestingly, while both osmolarity and divalent cation concentrations affect the growth  
447 of the *ΔhpnH* strain at low pH, the effects are different. Specifically, divalent cation  
448 concentration had the greatest effect on lag time while the added osmolytes affected both lag  
449 time and growth rate. These differences suggest that different mechanisms underpin the mutant's  
450 response, despite both having the potential to rigidify the outer membrane. We hypothesize that  
451 these differences may arise due to the inositol primarily addressing the root cause of the stress,  
452 hypoosmolality, while the increase in divalent cations protects against the effects of  
453 hypoosmolarity.

454         The sensitivity of hopanoid-deficient strains to specific external conditions suggested that  
455 extended hopanoids might be particularly important in helping cells respond to environmental  
456 changes. In contrast to diplopterol, a shorter hopanoid that contains a hydrophilic group, which  
457 has been shown to rigidify the membrane while keeping lipids from entering a gel phase and  
458 retaining lateral lipid diffusivity (52, 68) extended hopanoids had only been shown to rigidify the  
459 membrane (25, 69, 70). Our biophysical experiments confirm that extended hopanoids are

460 necessary for membrane rigidification, but also reveal that lack of extended hopanoids causes  
461 greater problems with membrane stability.  $\Delta hpnH$  displays much greater variability in lipid  
462 packing between conditions than WT, as evidenced by the larger  $\Delta GP$  values for the mutant.  
463 This result suggests that the WT can adjust its lipid packing to maintain a relatively constant  
464 membrane fluidity and is intrinsically more mechanically stable. In contrast, the  $\Delta hpnH$  strain  
465 struggles to adjust its lipid packing in response to changes in osmolarity, and membrane integrity  
466 is compromised by changes in pH. The lipid packing of the  $\Delta hpnH$  strain is primarily affected by  
467 the external environment. In the case of the pH 5 AG medium with 100 mM inositol added, both  
468 increased osmolarity and inositol specifically are known to rigidify membranes (65, 71),  
469 explaining the increased GP values for the  $\Delta hpnH$  strain. On the other hand, the WT can adjust  
470 its membrane to counteract environmentally-triggered membrane rigidification, thus leading to  
471 slightly lower GP values. Overall, these results indicate that extended hopanoids play an  
472 important role in *B. diazoefficiens* adjustment to and fortification against the external  
473 environment.

474 In conclusion, the lack of hopanoids, and specifically, extended hopanoids—which are  
475 required for HoLA biosynthesis—makes *B. diazoefficiens* particularly sensitivity to  
476 environmental conditions in ways that are relevant to its lifecycle. That the lack of extended  
477 hopanoids can be partially compensated for by a moderately high osmotic level, helps to resolve  
478 the paradox of why the  $\Delta hpnH$  mutant can be symbiotically successful if given sufficient time to  
479 develop within root nodules. Yet, its sensitivity to hypoosmotic conditions suggest that  
480 hopanoids may provide a fitness advantage to rhizobia in waterlogged soils, where osmolytes  
481 and divalent cations are diluted. Together, our findings emphasize the importance of considering  
482 the full ecophysiological picture when attempting to understand the selective benefits of a given

483 molecular component on an organism. It has been said that the only constant in life is change, a  
484 point worth remembering when considering the effects of hopanoids on peripatetic soil  
485 organisms.

486  
487 **Acknowledgements.** We thank members of the Newman lab for their helpful comments and  
488 insights, especially Brittany Belin and all past members of Team Hopanoid. Thank you to Hans  
489 Martin-Fischer for his constant support of our work. This research was enabled by a NSF  
490 graduate research fellowship Foundation (E.T.), NASA (NNX16AL96G to D.K.N.), a German  
491 Federal Ministry of Education and Research BMBF grant (to J.S., project 03Z22EN12), and a  
492 VW Foundation “Life” grant (to J.S., project 93090).

493

#### 494 **References**

- 495  
496 1. Doran JW, Zeiss MR. 2000. Soil health and sustainability: managing the biotic component  
497 of soil quality. *Applied Soil Ecology* 15:3–11.  
498 2. Norris CE, Congreves KA. 2018. Alternative management practices improve soil health  
499 indices in intensive vegetable cropping systems: A review. *Front Environ Sci* 6.  
500 3. Tilman D, Cassman KG, Matson PA, Naylor R, Polasky S. 2002. Agricultural  
501 sustainability and intensive production practices. *Nature* 418:671–677.  
502 4. Foyer CH, Nguyen H, Lam H-M. 2019. Legumes-The art and science of environmentally  
503 sustainable agriculture. *Plant Cell Environ* 42:1–5.  
504 5. Oldroyd GED, Murray JD, Poole PS, Downie JA. 2011. The rules of engagement in the  
505 legume-rhizobial symbiosis. *Annu Rev Genet* 45:119–144.  
506 6. Gibson KE, Kobayashi H, Walker GC. 2008. Molecular determinants of a symbiotic  
507 chronic infection. *Annu Rev Genet* 42:413–441.  
508 7. Pierre O, Engler G, Hopkins J, Brau F, Boncompagni E, Hérouart D. 2013. Peribacteroid  
509 space acidification: a marker of mature bacteroid functioning in *Medicago truncatula*  
510 nodules. *Plant Cell Environ* 36:2059–2070.  
511 8. Hunt S. 1993. Gas Exchange of Legume Nodules and the Regulation of Nitrogenase  
512 Activity. *Annu Rev Plant Physiol Plant Mol Biol* 44:483–511.  
513 9. Tookmanian EM, Belin BJ, Sáenz JP, Newman DK. 2021. The role of hopanoids in  
514 fortifying rhizobia against a changing climate. *Environ Microbiol* 23:2906–2918.  
515 10. Reckling M, Hecker J-M, Bergkvist G, Watson CA, Zander P, Schläpke N, Stoddard FL,  
516 Eory V, Topp CFE, Maire J, Bachinger J. 2016. A cropping system assessment

- 517 framework—Evaluating effects of introducing legumes into crop rotations. *European*  
518 *Journal of Agronomy* 76:186–197.
- 519 11. Bullock DG. 1992. Crop rotation. *CRC Crit Rev Plant Sci* 11:309–326.
- 520 12. Loureiro M de F, Kaschuk G, Alberton O, Hungria M. 2007. Soybean [*Glycine max* (L.)  
521 Merrill] rhizobial diversity in Brazilian oxisols under various soil, cropping, and  
522 inoculation managements. *Biol Fertil Soils* 43:665–674.
- 523 13. Zhang NN, Sun YM, Li L, Wang ET, Chen WX, Yuan HL. 2010. Effects of intercropping  
524 and *Rhizobium* inoculation on yield and rhizosphere bacterial community of faba bean  
525 (*Vicia faba* L.). *Biol Fertil Soils* 46:625–639.
- 526 14. Roughley RJ, Gemell LG, Thompson JA, Brockwell J. 1993. The number of  
527 *Bradyrhizobium* SP. (*Lupinus*) applied to seed and its effect on rhizosphere colonization,  
528 nodulation and yield of lupin. *Soil Biol Biochem* 25:1453–1458.
- 529 15. Corich V, Giacomini A, Vendramin E, Vian P, Carlot M, Concheri G, Polone E, Casella S,  
530 Nuti MP, Squartini A. 2007. Long term evaluation of field-released genetically modified  
531 rhizobia. *Environ Biosafety Res* 6:167–181.
- 532 16. O’Callaghan M. 2016. Microbial inoculation of seed for improved crop performance:  
533 issues and opportunities. *Appl Microbiol Biotechnol* 100:5729–5746.
- 534 17. Karmakar K, Rana A, Rajwar A, Sahgal M, Johri BN. 2015. Legume-Rhizobia Symbiosis  
535 Under Stress, p. 241–258. *In* Arora, NK (ed.), *Plant microbes symbiosis: applied facets*.  
536 Springer India, New Delhi.
- 537 18. Ilangumaran G, Smith DL. 2017. Plant growth promoting rhizobacteria in amelioration of  
538 salinity stress: A systems biology perspective. *Front Plant Sci* 8:1768.
- 539 19. Zahran HH. 1999. *Rhizobium*-legume symbiosis and nitrogen fixation under severe  
540 conditions and in an arid climate. *Microbiol Mol Biol Rev* 63:968–89, table of contents.
- 541 20. Delgado-Baquerizo M, Oliverio AM, Brewer TE, Benavent-González A, Eldridge DJ,  
542 Bardgett RD, Maestre FT, Singh BK, Fierer N. 2018. A global atlas of the dominant  
543 bacteria found in soil. *Science* 359:320–325.
- 544 21. Choma A, Komaniecka I, Zebracki K. 2017. Structure, biosynthesis and function of  
545 unusual lipids A from nodule-inducing and N<sub>2</sub>-fixing bacteria. *Biochim Biophys Acta Mol*  
546 *Cell Biol Lipids* 1862:196–209.
- 547 22. Serrato RV. 2014. Lipopolysaccharides in diazotrophic bacteria. *Front Cell Infect*  
548 *Microbiol* 4:119.
- 549 23. Nikaido H. 2003. Molecular Basis of Bacterial Outer Membrane Permeability Revisited.  
550 *Microbiol Mol Biol Rev* 67:593–656.
- 551 24. Komaniecka I, Zamłyńska K, Zan R, Staszczak M, Pawelec J, Seta I, Choma A. 2016.  
552 *Rhizobium* strains differ considerably in outer membrane permeability and polymyxin B  
553 resistance. *Acta Biochim Pol* 63:517–525.
- 554 25. Kulkarni G, Busset N, Molinaro A, Gargani D, Chaintreuil C, Silipo A, Giraud E, Newman  
555 DK. 2015. Specific hopanoid classes differentially affect free-living and symbiotic states of  
556 *Bradyrhizobium diazoefficiens*. *MBio* 6:e01251-15.
- 557 26. Belin BJ, Busset N, Giraud E, Molinaro A, Silipo A, Newman DK. 2018. Hopanoid lipids:  
558 from membranes to plant-bacteria interactions. *Nat Rev Microbiol* 16:304–315.
- 559 27. Silipo A, Vitiello G, Gully D, Sturiale L, Chaintreuil C, Fardoux J, Gargani D, Lee H-I,  
560 Kulkarni G, Busset N, Marchetti R, Palmigiano A, Moll H, Engel R, Lanzetta R, Paduano  
561 L, Parrilli M, Chang W-S, Holst O, Newman DK, Garozzo D, D’Errico G, Giraud E,  
562 Molinaro A. 2014. Covalently linked hopanoid-lipid A improves outer-membrane

- 563 resistance of a Bradyrhizobium symbiont of legumes. *Nat Commun* 5:5106.
- 564 28. Busset N, Di Lorenzo F, Palmigiano A, Sturiale L, Gressent F, Fardoux J, Gully D,  
565 Chaintreuil C, Molinaro A, Silipo A, Giraud E. 2017. The Very Long Chain Fatty Acid  
566 (C26:25OH) Linked to the Lipid A Is Important for the Fitness of the  
567 Photosynthetic Bradyrhizobium Strain ORS278 and the Establishment of a Successful  
568 Symbiosis with Aeschynomene Legumes. *Front Microbiol* 8:1821.
- 569 29. Komaniecka I, Choma A, Mazur A, Duda KA, Lindner B, Schwudke D, Holst O. 2014.  
570 Occurrence of an unusual hopanoid-containing lipid A among lipopolysaccharides from  
571 Bradyrhizobium species. *J Biol Chem* 289:35644–35655.
- 572 30. Belin BJ, Tookmanian EM, de Anda J, Wong GCL, Newman DK. 2019. Extended  
573 Hopanoid Loss Reduces Bacterial Motility and Surface Attachment and Leads to  
574 Heterogeneity in Root Nodule Growth Kinetics in a Bradyrhizobium-Aeschynomene  
575 Symbiosis. *Mol Plant Microbe Interact* 32:1415–1428.
- 576 31. Miller JH. 1972. *Experiments in Molecular Genetics*. Cold Spring Harbor Laboratory Pr,  
577 Cold Spring Harbor, N.Y.].
- 578 32. Mesa S, Hauser F, Friberg M, Malaguti E, Fischer H-M, Hennecke H. 2008.  
579 Comprehensive assessment of the regulons controlled by the FixLJ-FixK2-FixK1 cascade  
580 in Bradyrhizobium japonicum. *J Bacteriol* 190:6568–6579.
- 581 33. Regensburger B, Hennecke H. 1983. RNA polymerase from Rhizobium japonicum. *Arch*  
582 *Microbiol* 135:103–109.
- 583 34. Sadowsky MJ, Tully RE, Cregan PB, Keyser HH. 1987. Genetic Diversity in  
584 Bradyrhizobium japonicum Serogroup 123 and Its Relation to Genotype-Specific  
585 Nodulation of Soybean. *Appl Environ Microbiol* 53:2624–2630.
- 586 35. Cole MA, Elkan GH. 1973. Transmissible resistance to penicillin G, neomycin, and  
587 chloramphenicol in Rhizobium japonicum. *Antimicrob Agents Chemother* 4:248–253.
- 588 36. Kaczmarczyk A, Vorholt JA, Francez-Charlot A. 2013. Cumate-inducible gene expression  
589 system for sphingomonads and other Alphaproteobacteria. *Appl Environ Microbiol*  
590 79:6795–6802.
- 591 37. Eaton RW. 1997. p-Cymene catabolic pathway in Pseudomonas putida F1: cloning and  
592 characterization of DNA encoding conversion of p-cymene to p-cumate. *J Bacteriol*  
593 179:3171–3180.
- 594 38. Eaton RW. 1996. p-Cumate catabolic pathway in Pseudomonas putida F1: cloning and  
595 characterization of DNA carrying the cmt operon. *J Bacteriol* 178:1351–1362.
- 596 39. Ledermann R. 2017. Role of general stress response in trehalose biosynthesis for functional  
597 rhizobia-legume symbiosis. Doctoral dissertation, ETH Zurich.
- 598 40. Gibson DG, Young L, Chuang R-Y, Venter JC, Hutchison CA, Smith HO. 2009.  
599 Enzymatic assembly of DNA molecules up to several hundred kilobases. *Nat Methods*  
600 6:343–345.
- 601 41. Beck C, Marty R, Kläusli S, Hennecke H, Göttfert M. 1997. Dissection of the transcription  
602 machinery for housekeeping genes of Bradyrhizobium japonicum. *J Bacteriol* 179:364–  
603 369.
- 604 42. Masloboeva N, Reutimann L, Stiefel P, Follador R, Leimer N, Hennecke H, Mesa S,  
605 Fischer H-M. 2012. Reactive oxygen species-inducible ECF  $\sigma$  factors of Bradyrhizobium  
606 japonicum. *PLoS One* 7:e43421.
- 607 43. Hahn M, Meyer L, Studer D, Regensburger B, Hennecke H. 1984. Insertion and deletion  
608 mutations within the nif region of Rhizobium japonicum. *Plant Mol Biol* 3:159–168.



- 609 44. Ledermann R, Bartsch I, Remus-Emsermann MN, Vorholt JA, Fischer H-M. 2015. Stable  
610 Fluorescent and Enzymatic Tagging of Bradyrhizobium diazoefficiens to Analyze Host-  
611 Plant Infection and Colonization. *Mol Plant Microbe Interact* 28:959–967.
- 612 45. Tjørve KMC, Tjørve E. 2017. The use of Gompertz models in growth analyses, and new  
613 Gompertz-model approach: An addition to the Unified-Richards family. *PLoS One*  
614 12:e0178691.
- 615 46. Zwietering MH, Jongenburger I, Rombouts FM, van 't Riet K. 1990. Modeling of the  
616 bacterial growth curve. *Appl Environ Microbiol* 56:1875–1881.
- 617 47. Levental KR, Malmberg E, Symons JL, Fan Y-Y, Chapkin RS, Ernst R, Levental I. 2020.  
618 Lipidomic and biophysical homeostasis of mammalian membranes counteracts dietary  
619 lipid perturbations to maintain cellular fitness. *Nat Commun* 11:1339.
- 620 48. Rizk S, Henke P, Santana-Molina C, Martens G, Gnädig M, Nguyen NA, Devos DP,  
621 Neumann-Schaal M, Saenz JP. 2021. Functional diversity of isoprenoid lipids in  
622 *Methylobacterium extorquens* PA1. *Mol Microbiol*.
- 623 49. Clifton LA, Skoda MWA, Le Brun AP, Ciesielski F, Kuzmenko I, Holt SA, Lakey JH.  
624 2015. Effect of divalent cation removal on the structure of gram-negative bacterial outer  
625 membrane models. *Langmuir* 31:404–412.
- 626 50. Schäfer A, Tauch A, Jäger W, Kalinowski J, Thierbach G, Pühler A. 1994. Small  
627 mobilizable multi-purpose cloning vectors derived from the *Escherichia coli* plasmids  
628 pK18 and pK19: selection of defined deletions in the chromosome of *Corynebacterium*  
629 *glutamicum*. *Gene* 145:69–73.
- 630 51. Bolan NS, Hedley MJ, White RE. 1991. Processes of soil acidification during nitrogen  
631 cycling with emphasis on legume based pastures. *Plant Soil* 134:53–63.
- 632 52. Sáenz JP, Sezgin E, Schwille P, Simons K. 2012. Functional convergence of hopanoids and  
633 sterols in membrane ordering. *Proc Natl Acad Sci USA* 109:14236–14240.
- 634 53. Ma Y, Benda A, Kwiatek J, Owen DM, Gaus K. 2018. Time-Resolved Laurdan  
635 Fluorescence Reveals Insights into Membrane Viscosity and Hydration Levels. *Biophys J*  
636 115:1498–1508.
- 637 54. Steinkühler J, Sezgin E, Urbančič I, Eggeling C, Dimova R. 2019. Mechanical properties  
638 of plasma membrane vesicles correlate with lipid order, viscosity and cell density.  
639 *Commun Biol* 2:337.
- 640 55. Zgurskaya HI, López CA, Gnanakaran S. 2015. Permeability Barrier of Gram-Negative  
641 Cell Envelopes and Approaches To Bypass It. *ACS Infect Dis* 1:512–522.
- 642 56. Sáenz JP, Grosser D, Bradley AS, Lagny TJ, Lavrynenko O, Broda M, Simons K. 2015.  
643 Hopanoids as functional analogues of cholesterol in bacterial membranes. *Proc Natl Acad*  
644 *Sci USA* 112:11971–11976.
- 645 57. Brandenburg K, Seydel U. 1990. Investigation into the fluidity of lipopolysaccharide and  
646 free lipid A membrane systems by Fourier-transform infrared spectroscopy and differential  
647 scanning calorimetry. *Eur J Biochem* 191:229–236.
- 648 58. Welander PV, Hunter RC, Zhang L, Sessions AL, Summons RE, Newman DK. 2009.  
649 Hopanoids play a role in membrane integrity and pH homeostasis in *Rhodospseudomonas*  
650 *palustris* TIE-1. *J Bacteriol* 191:6145–6156.
- 651 59. Vitiello G, Oliva R, Petraccone L, Vecchio PD, Heenan RK, Molinaro A, Silipo A,  
652 D'Errico G, Paduano L. 2021. Covalently bonded hopanoid-Lipid A from *Bradyrhizobium*:  
653 The role of unusual molecular structure and calcium ions in regulating the lipid bilayers  
654 organization. *J Colloid Interface Sci* 594:891–901.

- 655 60. Papahadjopoulos D, Portis A, Pangborn W. 1978. Calcium-induced lipid phase transitions  
656 and membrane fusion. *Ann N Y Acad Sci* 308:50–66.
- 657 61. Macció D, Fabra A, Castro S. 2002. Acidity and calcium interaction affect the growth of  
658 *Bradyrhizobium* sp. and the attachment to peanut roots. *Soil Biol Biochem* 34:201–208.
- 659 62. Izmailov SF. 2003. Calcium-Based Interactions of Symbiotic Partners in Legumes: Role of  
660 Peribacteroid Membrane. *Russian Journal of Plant Physiology*.
- 661 63. Liu J, Miller SS, Graham M, Bucciarelli B, Catalano CM, Sherrier DJ, Samac DA,  
662 Ivashuta S, Fedorova M, Matsumoto P, Gantt JS, Vance CP. 2006. Recruitment of novel  
663 calcium-binding proteins for root nodule symbiosis in *Medicago truncatula*. *Plant Physiol*  
664 141:167–177.
- 665 64. Andreev IM, Andreeva IN, Dubrovo PN, Krylova VV, Kozharinova GM, Izmailov SF.  
666 2001. Calcium Status of Yellow Lupin Symbiosomes as a Potential Regulator of Their  
667 Nitrogenase Activity: The Role of the Peribacteroid Membrane. *Russian Journal of Plant*  
668 *Physiology*.
- 669 65. Los DA, Murata N. 2004. Membrane fluidity and its roles in the perception of  
670 environmental signals. *Biochim Biophys Acta* 1666:142–157.
- 671 66. Miller KJ, Wood JM. 1996. Osmoadaptation by rhizosphere bacteria. *Annu Rev Microbiol*  
672 50:101–136.
- 673 67. Tejima K, Arima Y, Yokoyama T, Sekimoto H. 2003. Composition of amino acids,  
674 organic acids, and sugars in the peribacteroid space of soybean root nodules. *Soil Sci Plant*  
675 *Nutr* 49:239–247.
- 676 68. Mangiarotti A, Genovese DM, Naumann CA, Monti MR, Wilke N. 2019. Hopanoids, like  
677 sterols, modulate dynamics, compaction, phase segregation and permeability of  
678 membranes. *Biochim Biophys Acta Biomembr* 1861:183060.
- 679 69. Kannenberg E, Blume A, McElhaney RN, Poralla K. 1983. Monolayer and calorimetric  
680 studies of phosphatidylcholines containing branched-chain fatty acids and of their  
681 interactions with cholesterol and with a bacterial hopanoid in model membranes.  
682 *Biochimica et Biophysica Acta (BBA) - Biomembranes* 733:111–116.
- 683 70. Chen Z, Sato Y, Nakazawa I, Suzuki Y. 1995. Interactions between bacteriohopane-  
684 32,33,34,35-tetrol and liposomal membranes composed of dipalmitoylphosphatidylcholine.  
685 *Biol Pharm Bull* 18:477–480.
- 686 71. Crowe LM, Mouradian R, Crowe JH, Jackson SA, Womersley C. 1984. Effects of  
687 carbohydrates on membrane stability at low water activities. *Biochim Biophys Acta*  
688 769:141–150.
- 689 72. Casadaban MJ, Cohen SN. 1980. Analysis of gene control signals by DNA fusion and  
690 cloning in *Escherichia coli*. *J Mol Biol* 138:179–207.
- 691 73. Simon R, Priefer U, Pühler A. 1983. A Broad Host Range Mobilization System for In Vivo  
692 Genetic Engineering: Transposon Mutagenesis in Gram Negative Bacteria. *Nat Biotechnol*  
693 1:784–791.
- 694 74. Ledermann R, Strebel S, Kampik C, Fischer H-M. 2016. Versatile Vectors for Efficient  
695 Mutagenesis of *Bradyrhizobium diazoefficiens* and Other Alphaproteobacteria. *Appl*  
696 *Environ Microbiol* 82:2791–2799.
- 697

698 **Figure Legends**

699 Figure 1. Hopanoid biosynthesis and HoLA structure. The biosynthesis of hopanoids is shown on  
700 the left from squalene to the unextended hopanoids (magenta) to the extended hopanoids (green).  
701 All of these hopanoids may be methylated at the C-2 position by the hopanoid methylase HpnP.  
702 These hopanoids are transferred to the outer membrane by the HpnN hopanoid transporter.  
703 Extended hopanoids are attached to the very long chain fatty acid (yellow) on lipid A to create  
704 HoLA which also resides in the outer membrane.

705  
706 Figure 2. Hopanoids are conditionally essential in *B. diazoefficiens*. A  $\Delta shc$  deletion mutant with  
707 a chromosomally integrated cumate-inducible *shc* gene (cumate conditional SHC) is unable to  
708 grow on a PSY medium agar plate, but this strain can grow on a PSY agar plate containing  
709 cumate which restores hopanoid production. On an AG medium agar plate, the cumate  
710 conditional SHC mutant can grow more than on the PSY, but less growth than on PSY with  
711 cumate. There is visually greater growth on pH 5 AG medium than on PSY. WT and the  $\Delta hpnH$   
712 complement strains can grow in all conditions. The  $\Delta hpnH$  strain can grow in all conditions as  
713 well, with the best growth on the AG medium agar plate.

714  
715 Figure 3. *B. diazoefficiens*  $\Delta hpnH$  strain is sensitive to low pH and stationary phase. (A, C)  
716 Growth of WT (black circles),  $\Delta hpnH$  complement (grey triangles), and  $\Delta hpnH$  (white squares)  
717 in AG media at pH 6.6 and pH 5 was monitored at an optical density of 600 nm (OD<sub>600</sub>). Each  
718 curve represents the average of three biological replicates. (B) Colony forming units per mL  
719 (CFUs/mL) were measured for WT (black circles),  $\Delta hpnH$  complement (grey triangles), and  
720  $\Delta hpnH$  (white squares) strains grown in AG media at pH 6.6 during exponential phase (24 hrs)

721 and stationary phase (72 hrs). Error bars (standard deviation) are included (A-C), but some are  
722 smaller than the point markers.

723

724 Figure 4. *B. diazoefficiens*  $\Delta hpnH$  strain growth is sensitive to the concentration of inositol. (A)

725 Growth of WT (black circles),  $\Delta hpnH$  complement (grey triangles), and  $\Delta hpnH$  (white squares)

726 in AG media at pH 5 with increasing concentration of inositol was monitored at OD<sub>600</sub>. The

727 colors of the markers correspond to different concentrations of inositol as noted in the legend.

728 (B) Growth rate ( $\mu$ ) and lag time were quantified by fitting a single Gompertz to each growth

729 curves from (A). The results are plotted according to increasing concentration of inositol. Arrows

730 point to the concentration of inositol (100 mM) where the growth of the  $\Delta hpnH$  strain is

731 optimized. Error bars (standard deviation) are included, but some are smaller than the point

732 markers.

733

734 Figure 5. *B. diazoefficiens*  $\Delta hpnH$  strain growth is sensitive to the concentration of calcium. (A)

735 Growth of WT (black circles),  $\Delta hpnH$  complement (grey triangles), and  $\Delta hpnH$  (white squares)

736 in AG media at pH 5 with different concentrations of divalent cations was monitored at OD<sub>600</sub>.

737 The colors of the markers correspond to different concentrations of Ca<sup>2+</sup> ions as noted in the

738 legend. (D) Growth rate ( $\mu$ ) and lag time were quantified by fitting a single Gompertz curve to

739 each growth curve from (C). The results are plotted according to increasing concentration of

740 Ca<sup>2+</sup> ions with the low dication condition included at y=0. All growth curves and quantifications

741 represent the average of three biological replicates. Error bars (standard deviation) are included,

742 but some are smaller than the point markers.

743

744 Figure 6. *B. diazoefficiens*  $\Delta hpnH$  strain is deficient in its ability to regulate its membrane  
745 properties. (A) Lipid packing measured by Di-4 general polarization (GP) index for WT,  $\Delta hpnH$   
746 complement, and  $\Delta hpnH$  strains grown in AG media with pH 6.6 (dark grey), pH 5 (light grey),  
747 and pH 5 with 100 mM added inositol (grey dots). Individual measurements are shown as black  
748 circles.  $\Delta GP$  for each strain compared to the AG pH 5 condition. Error bars (standard deviation)  
749 are included. (B) Relative cell envelope permeability measured by a fluorescein diacetate  
750 diffusivity assay of WT,  $\Delta hpnH$  complement, and  $\Delta hpnH$  strains grown in AG media with pH  
751 6.6 (dark grey), pH 5 (light grey), and pH 5 with 100 mM added inositol (grey dots). Individual  
752 measurements are shown as black circles. Error bars (standard deviation) are included.

753

754

755

756

757 Figure S1. Cumate-inducible system functions as an on/off switch. For the strain LacZYA-Q1,  
758 when no cumate inducer is added, there is no  $\beta$ -Galactosidase activity. When 25  $\mu$ M cumate  
759 inducer is added,  $\beta$ -Galactosidase activity is observed.

760

761 Figure S2. Differences in CFUs/mL not observed by OD<sub>600</sub>. OD<sub>600</sub> was measured for WT  
762 (circles),  $\Delta$ *hpnH* complement (triangles), and  $\Delta$ *hpnH* (squares) strains grown in AG media at pH  
763 6.6 during exponential phase (24 hrs) and stationary phase (72 hrs). Error bars (standard  
764 deviation) are included, but some are obscured by the point markers.

765

766 Figure S3. *B. diazoefficiens*  $\Delta$ *hpnH* strain growth is sensitive to the concentration of sorbitol. (A)  
767 Growth of WT (circles),  $\Delta$ *hpnH* complement (triangles), and  $\Delta$ *hpnH* (squares) in AG media at  
768 pH 5 with increasing concentration of sorbitol was monitored at OD<sub>600</sub>. The colors of the  
769 markers correspond to different concentrations of sorbitol as noted in the legend. (B)  $\mu$  and lag  
770 were quantified by fitting a single Gompertz to each growth curve from (A). The results are  
771 plotted according to increasing concentration of sorbitol.

772

773 Figure S4. *B. diazoefficiens*  $\Delta$ *hpnH* strain growth is sensitive to the concentration of magnesium  
774 ions. (A) Growth of WT (circles),  $\Delta$ *hpnH* complement (triangles), and  $\Delta$ *hpnH* (squares) in AG  
775 media at pH 5 with different concentrations of divalent cations was monitored at OD<sub>600</sub>. The  
776 colors of the markers correspond to different concentrations of Mg<sup>2+</sup> ions as noted in the legend.  
777 (B)  $\mu$  and lag were quantified by fitting a single Gompertz curve to each growth curve from (A).  
778 The results are plotted according to increasing concentration of Mg<sup>2+</sup> ions with the low dication  
779 condition included at y=0. All growth curves and quantifications represent the average of three

780 biological replicates. Error bars (standard deviation) are included, but some are smaller than the  
781 point markers.

782

783 Figure S5. *B. diazoefficiens*  $\Delta$ *hpnH* strain membrane is less ordered than WT when grown in AG  
784 media. Whole-cell membrane fluidity measurements by fluorescence polarization of DPH. Error  
785 bars represent the standard deviations from three biological replicates.

786

787 Figure 1.

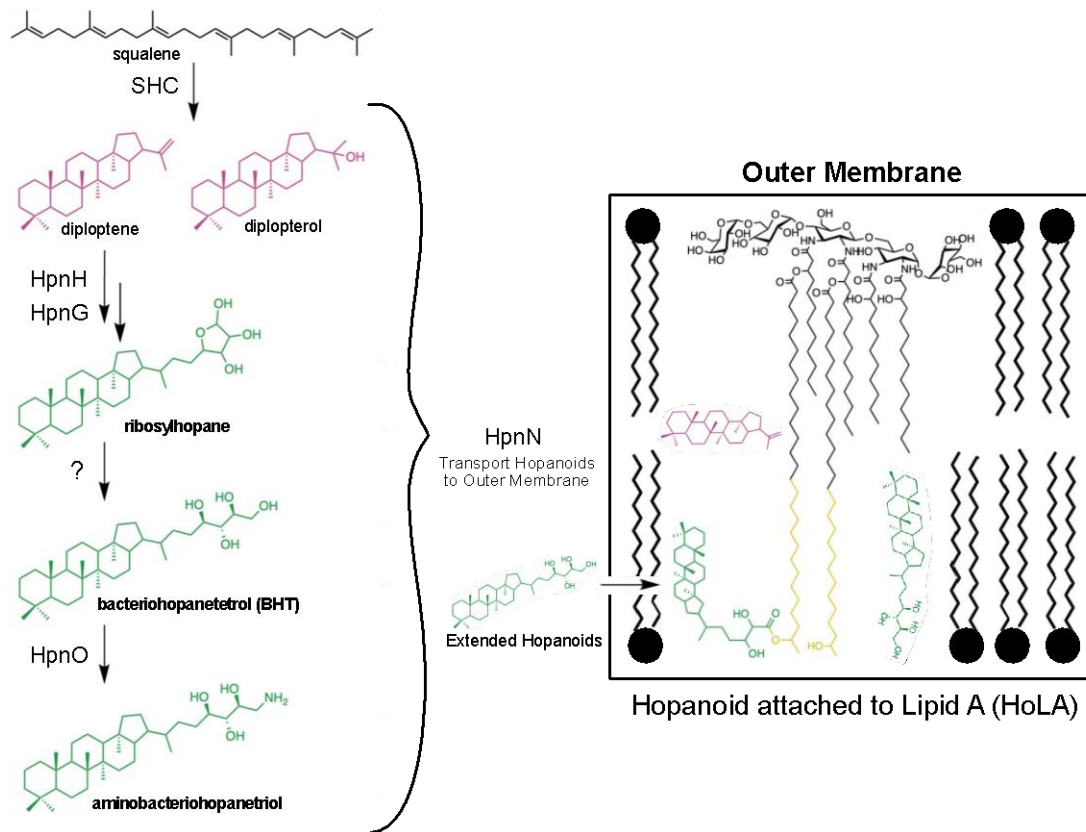

788  
789  
790  
791  
792  
793  
794  
795  
796  
797  
798  
799  
800  
801  
802  
803  
804  
805  
806  
807  
808  
809



810 Figure 2.  
811

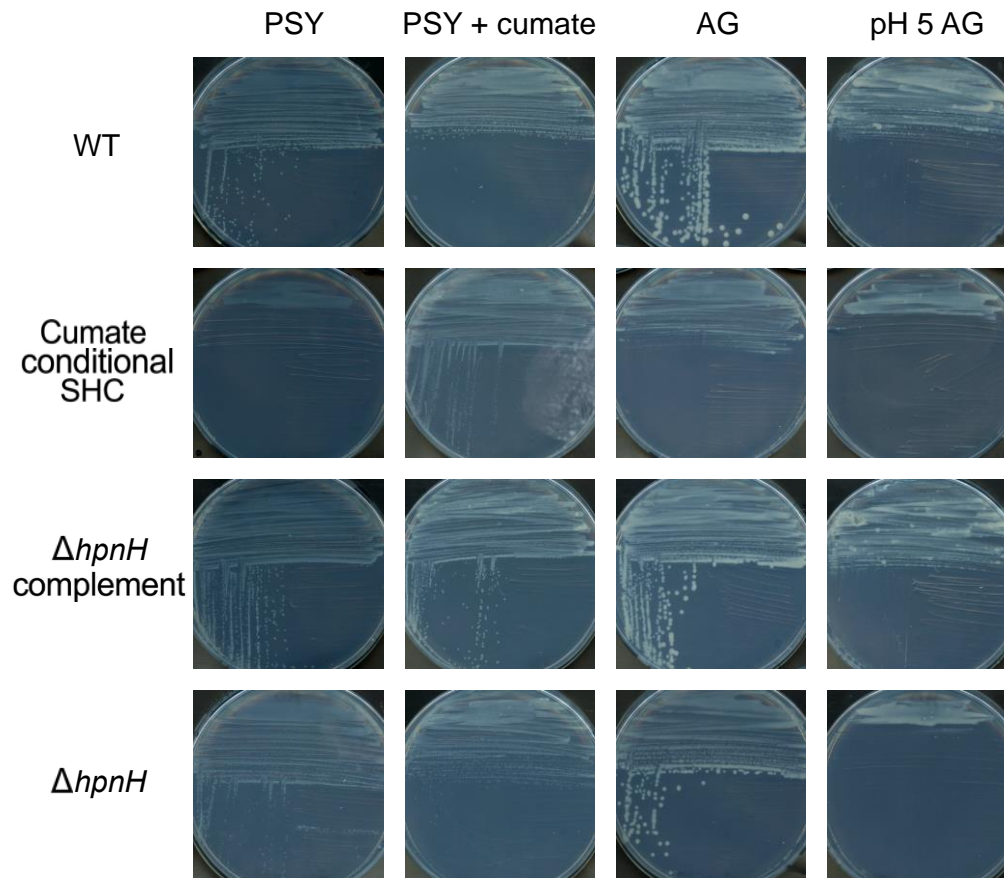

812  
813  
814  
815  
816  
817

Table 1. Differences between PSY and AG Media

| Medium | Buffer                     | Divalent Cations                                    | Carbon Sources                                 | Osmolarity   | pH  |
|--------|----------------------------|-----------------------------------------------------|------------------------------------------------|--------------|-----|
| PSY    | 4.3 mM Phosphate           | 45 mM CaCl <sub>2</sub><br>400 mM MgSO <sub>4</sub> | Arabinose<br>Yeast Extract<br>Peptone          | 53±0.06 mOsM | 7   |
| AG     | 5.5 mM HEPES<br>5.6 mM MES | 90 mM CaCl <sub>2</sub><br>730 mM MgSO <sub>4</sub> | Arabinose<br>Yeast Extract<br>Sodium Gluconate | 69±1.2 mOsM  | 6.6 |

818  
819  
820  
821  
822  
823  
824

825 Figure 3.

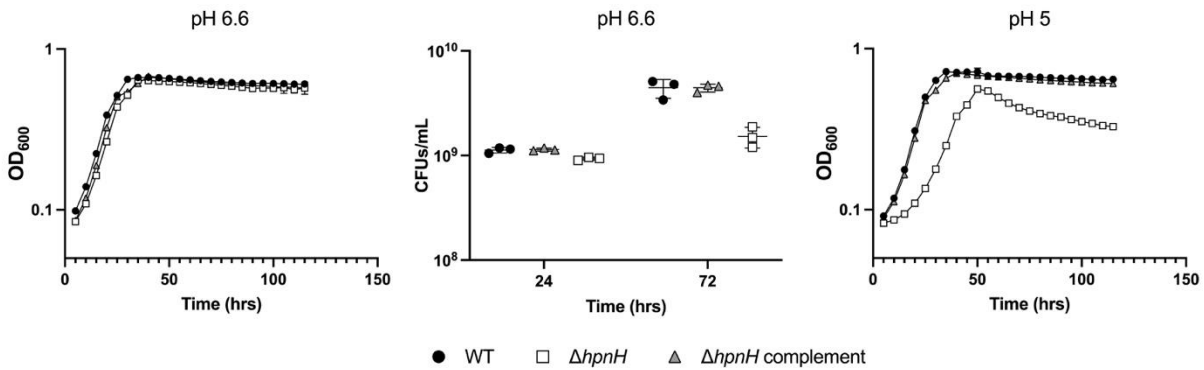

826  
827  
828

829 Figure 4.

830

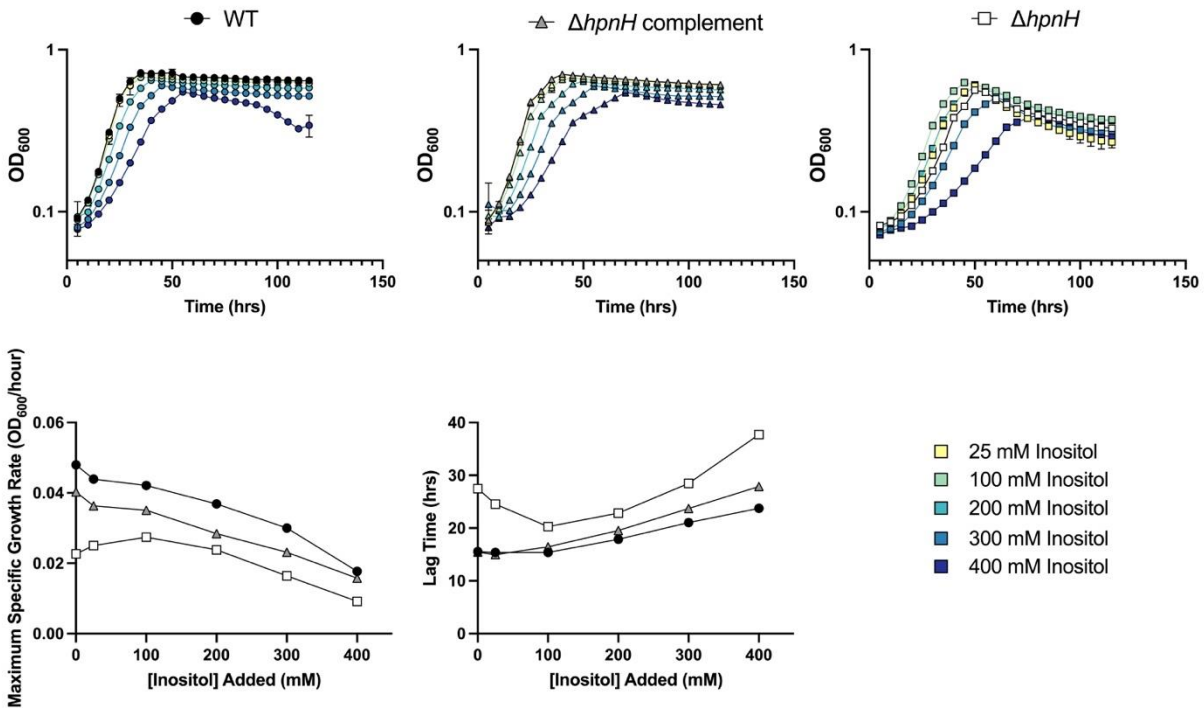

831  
832  
833  
834  
835  
836  
837  
838  
839  
840  
841  
842

843 Figure 5.

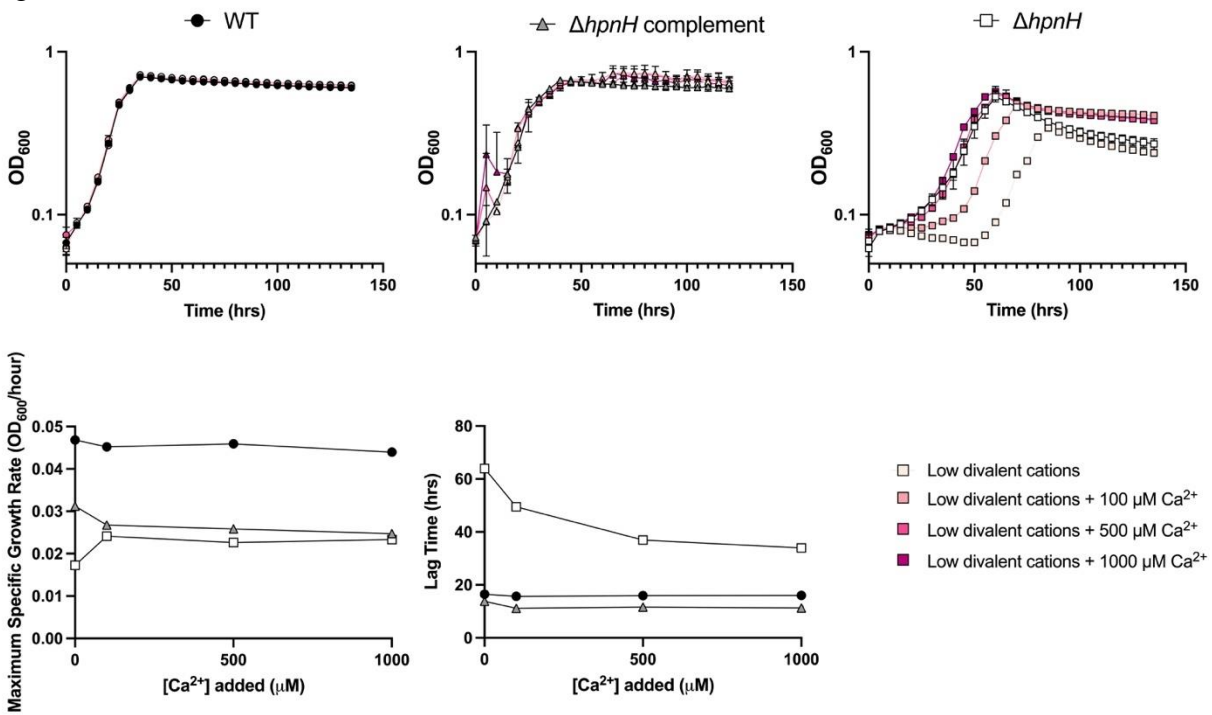

844  
845  
846  
847

848 Figure 6.  
849

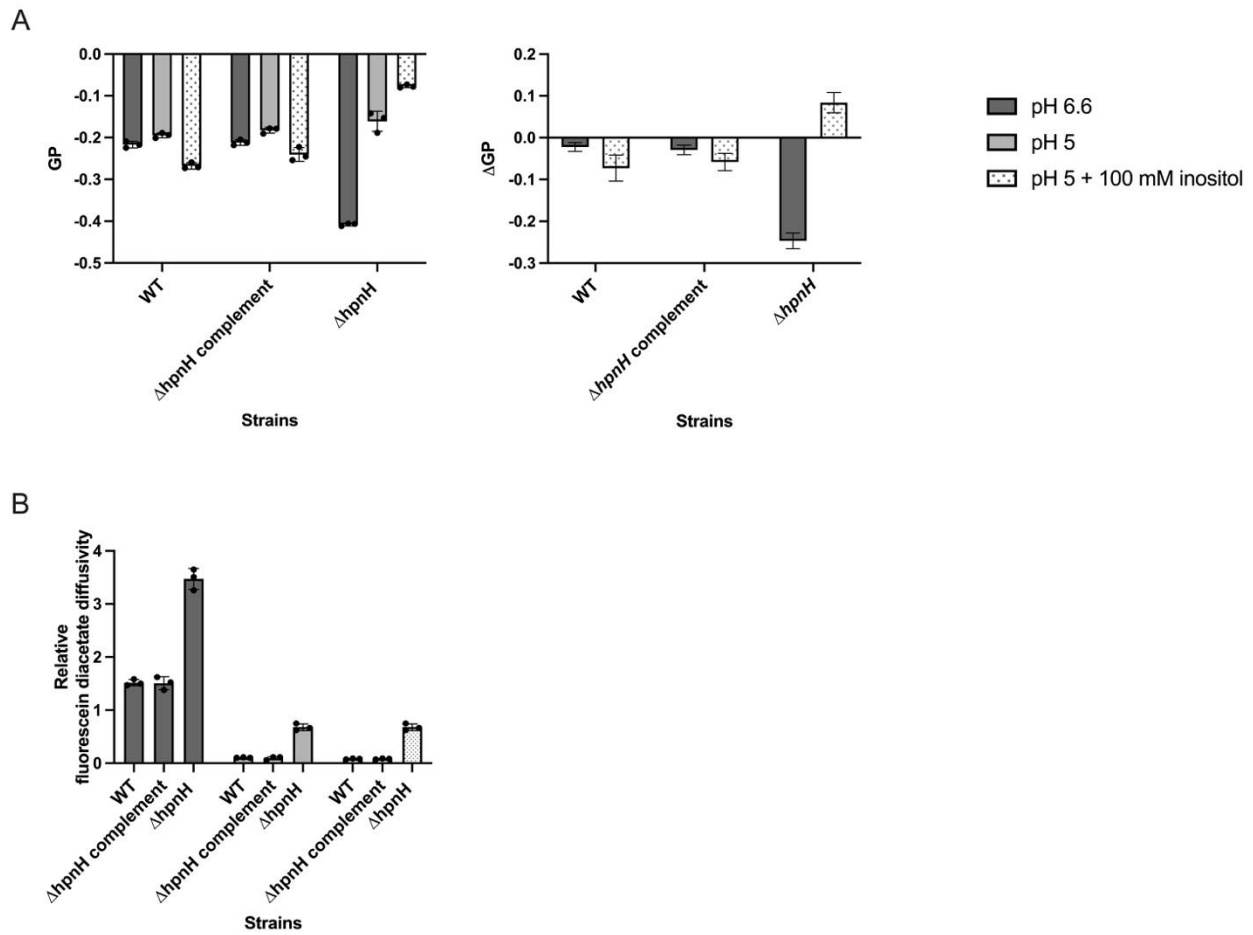

850  
851  
852  
853  
854  
855  
856  
857  
858  
859  
860  
861

862 **Table S1. Strains, plasmids, and primers used in this study<sup>a</sup>**

| Strain, plasmid, or primer | Genotype, description, and/or construction                                                                                                                                                                                                            | Source or Reference    |
|----------------------------|-------------------------------------------------------------------------------------------------------------------------------------------------------------------------------------------------------------------------------------------------------|------------------------|
| <b>Strains</b>             |                                                                                                                                                                                                                                                       |                        |
| DH10                       | <i>Escherichia coli</i> ; F <i>endA1 recA1 galE15 galK16 nupG rpsL ΔlacX74 Φ80lacZΔM15 araD139 Δ(ara,leu)7697 mcrA Δ(mrr-hsdRMS-mcrBC) λ<sup>-</sup></i> ; DKN89                                                                                      | (72)                   |
| DH5α                       | <i>E. coli</i> ; <i>supE44 ΔlacU169 (φ80 lacZΔM15) hsdR17 recA1 gyrA96 thi-1 relA2</i>                                                                                                                                                                | BRL, Gaithersburg, USA |
| S17-1                      | <i>E. coli</i> ; <i>thi pro hdsR hdsM<sup>+</sup> recA</i> ; chromosomal insertion of RP4-2 (Tc::Mu Km::Tn7); DKN1                                                                                                                                    | (73)                   |
| GM2163                     | <i>Escherichia coli</i> ; St <sup>r</sup> , Cm <sup>r</sup> ; F- <i>araC14 leuB6 fhuA31 lacY1 tsx-78 glnV44(AS) galK2(Oc) galT22 λ<sup>-</sup> mcrA dcm-6 hisG4(Oc) rfbD1 rpsL136(StrR) dam-13::Tn9(CamR) xylA5 mtl-1 thi-1 mcrB1 hsdR2</i> ; DKN307  | New England Biolabs    |
| DKN1391                    | <i>B. diazoefficiens</i> 110 <i>spc4</i> , Sp <sup>r</sup> , WT                                                                                                                                                                                       | (33)                   |
| DKN1529                    | <i>B. diazoefficiens</i> 110 <i>spc4</i> , Sp <sup>r</sup> , <i>ΔhpnH</i> ; deletion of <i>blr3006</i> in DKN1391                                                                                                                                     | (25)                   |
| LacZYA-Q1                  | <i>B. diazoefficiens</i> Tc <sup>r</sup> 110 <i>spc4</i> Sp <sup>r</sup> , Tc <sup>r</sup> , pRJPcu1- <i>lacZYA</i> at <i>scoI</i> locus; chromosomal integration of cumate inducible <i>lacZ</i> operon                                              | This study             |
| DKN2510                    | <i>B. diazoefficiens</i> 110 <i>spc4</i> , Sp <sup>r</sup> , Tc <sup>r</sup> , <i>ΔhpnH</i> P <sub><i>aphII</i></sub> - <i>hpnH</i> at <i>scoI</i> locus; complementation of <i>blr3006</i> in DKN1529                                                | (30)                   |
| DKN1784                    | <i>B. diazoefficiens</i> 110 <i>spc4</i> , Sp <sup>r</sup> , <i>Δshc</i> P <sub>cu</sub> - <i>shc</i> at <i>scoI</i> locus; deletion of <i>blr3004</i> in DKN1391 followed by complementation with cumate inducible promoter                          | This study             |
| <b>Plasmids</b>            |                                                                                                                                                                                                                                                       |                        |
| pGK259                     | <i>shc</i> deletion vector; HindIII/PstI-digested <i>blr3004 (shc)</i> upstream and downstream fusion PCR product was ligated to HindIII/PstI-digested pK18 <i>mobsacB</i> Km <sup>r</sup> mobilizable pUC18 derivative, <i>mob, sacB</i> , (DKN1492) | (25)                   |
| pQH2                       | Tc <sup>r</sup> pQH derivative with pBBR <i>oriV</i>                                                                                                                                                                                                  | (36)                   |
| pRJPaph-lacZYA             | Tc <sup>r</sup> P <sub><i>aphII</i></sub> - <i>lacZYA</i> for integration downstream of <i>scoI</i>                                                                                                                                                   | (74)                   |
| pQH2-Prrn-mut2             | Tc <sup>r</sup> (pQH2) <i>Bd</i> -P <sub><i>rtn-mut2</i></sub> between <i>cuO</i>                                                                                                                                                                     | This study             |
| pRJPaph-sYFP2              | Constitutive sYFP2 expression vector; Tc <sup>r</sup> (pRJPaph- <i>gfp_a1</i> ) Paph- <i>sYFP2</i> for integration downstream of the <i>scoI</i> locus.                                                                                               | (44)                   |
| pGK302                     | <i>shc</i> cumate conditional complement vector; Cloned <i>B. diazoefficiens shc</i> coding region into pRJPcu- <i>lacZYA</i> using SpeI/PstI sites                                                                                                   | This study             |
| <b>Primers</b>             |                                                                                                                                                                                                                                                       |                        |
| Prrn-mut2_f                | GTACGTTGACAGCCCCGGAAGGTGGGTGCTATAACCCC                                                                                                                                                                                                                |                        |

|                |                                             |  |
|----------------|---------------------------------------------|--|
| Prrn-mut2_r    | GGGGTTATAGCACCCACCTTCCGGGCTGTCAAC           |  |
| Shccodfor-SpeI | TAT ATA TAA CTA GTA TGG ATT CCG TGA ACG CG  |  |
| Shccodrev-PstI | TAT ATA TAC TGC AGT CAC ATT CCG ACC CCT ACC |  |

863 <sup>a</sup>Km, Kanamycin; Sp, Spectinomycin; Tc, Tetracycline; Str, Streptomycin; Cam,  
864 chloramphenicol; <sup>r</sup> denotes resistance; <sup>\*</sup> denotes genes which were codon optimized for GC-rich  
865 organisms (36).

866

867

868

869 Figure S1.

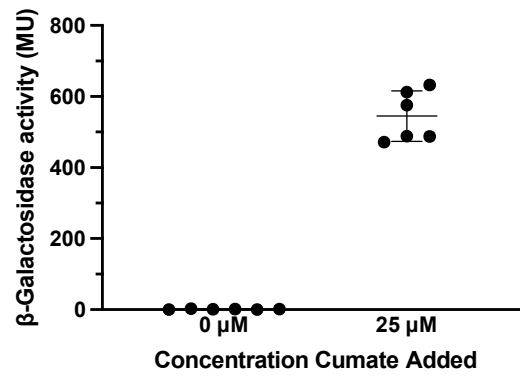

870

871

872 Figure S2.

873

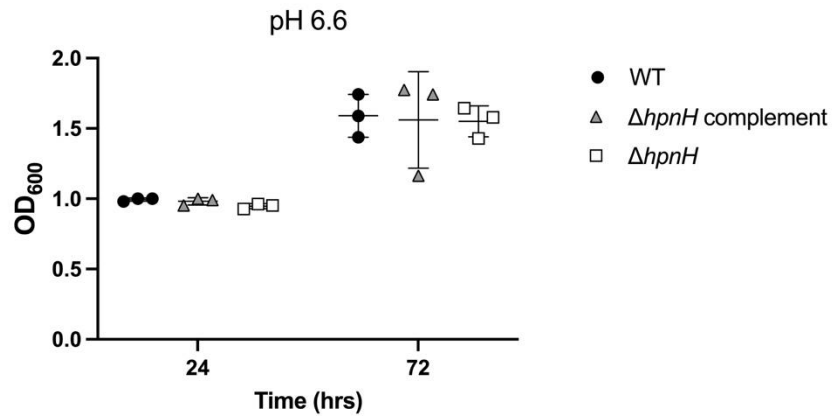

874

875

876

877

878 Figure S3.  
879

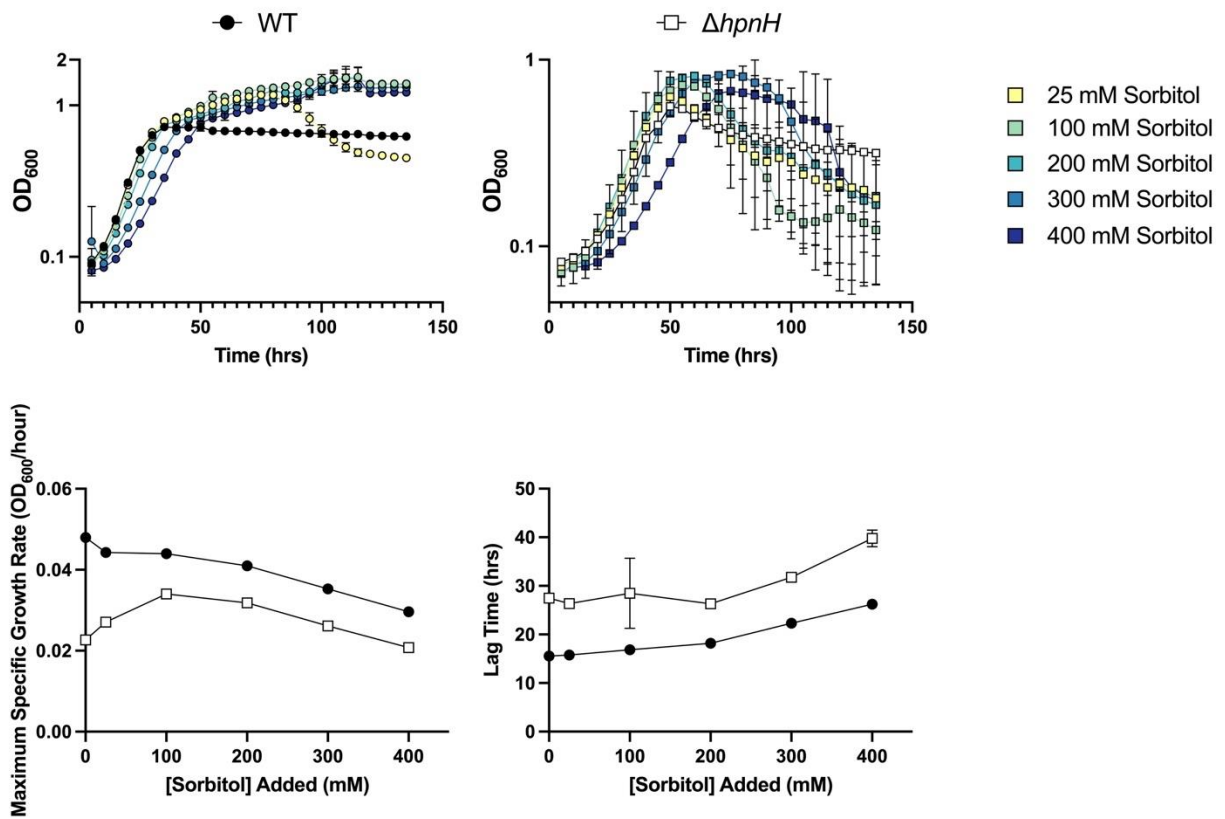

880  
881  
882



883 Figure S4.

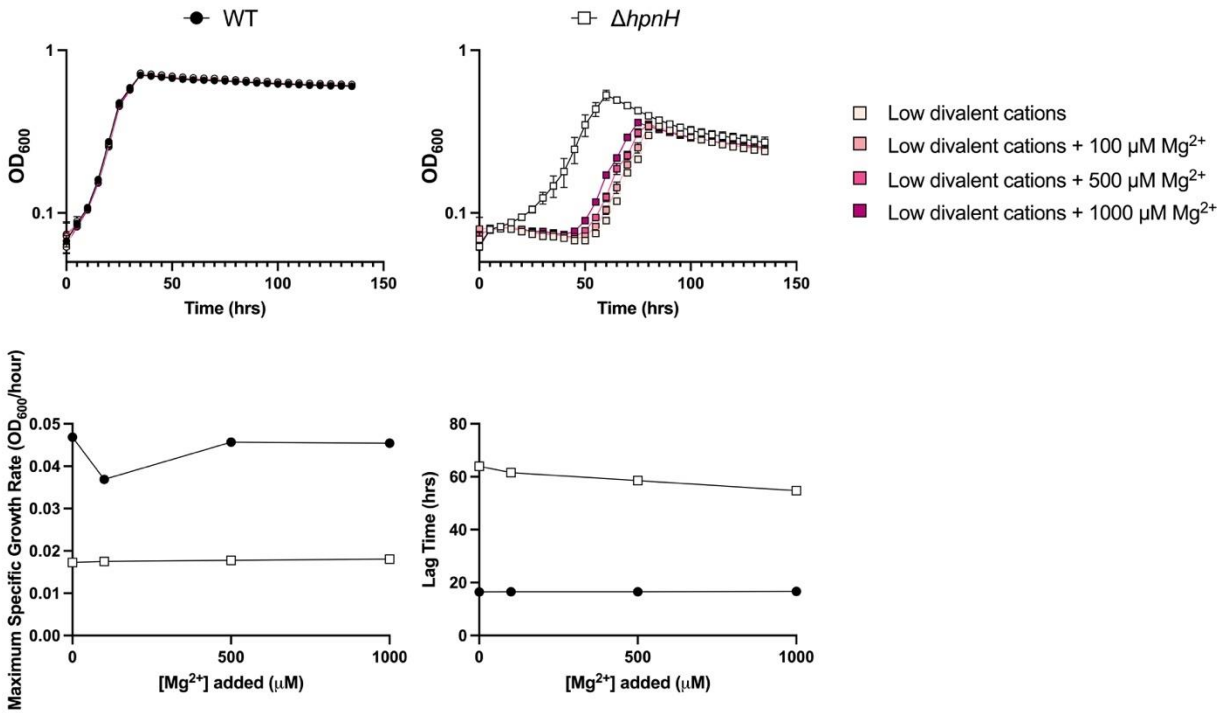

884  
885  
886  
887

Figure S5.

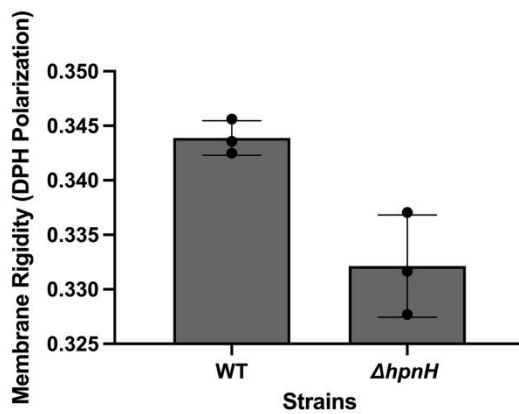

888
